## Palliative care delivery according to age among metastatic breast cancer patients. ESME-MBC cohort

Matthieu Frasca

*M Frasca<sup>1,2</sup>, C Courtinard<sup>3</sup>, C Bouleuc<sup>4</sup>, C Levy<sup>5</sup>, MA Mouret-Reynier<sup>6</sup>, T Bachelot<sup>7</sup>, A Goncalves<sup>8</sup>, V Perotin<sup>9</sup>, JC Eymard<sup>10</sup>, S Mathoulin-Pelissier<sup>1,11</sup>*

<sup>1</sup>INSERM U1219 Epicene team, University of Bordeaux, Bordeaux, France

<sup>2</sup>Department of palliative Medicine, CHU of Bordeaux, Bordeaux, France

<sup>3</sup>Department of Research and Development, R&D Unicancer, Paris, France

<sup>4</sup>Department of Medical Oncology, Institut Curie, Paris, France

<sup>5</sup>Department of Medical Oncology, Centre François Baclesse, Caen, France

<sup>6</sup>Department of Medical Oncology, Centre Jean Perrin, Clermont-Ferrand, France

<sup>7</sup>Department of Medical Oncology, Centre Léon Bérard, Lyon, France

<sup>8</sup>Department of Medical Oncology, Institut Paoli-Calmettes, Marseille, France

<sup>9</sup>Department of Palliative Medicine, Institut du Cancer de Montpellier, Montpellier, France

<sup>10</sup>Department of Medical Oncology, Institut de Cancérologie Jean-Godinot, Reims, France

<sup>11</sup>INSERM CIC1401, Institut Bergonie, Bordeaux, France

Contact: matthieu.frasca@chu-bordeaux.fr

### Background:

Metastatic breast cancer (MBC) may require inpatient palliative care (IPC) but literature suggests age-related disparities in palliative care delivery. This study, based on real-world data, aimed to assess the cumulative incidence function (CIF) of IPC delivery and if age is an independent factor, taking into account the competing risk of death.

### Methods:

The national multicenter ESME (Epidemiology-Strategy-Medical-Economical)-MBC cohort includes consecutive MBC patients treated in the 18 French Comprehensive Cancer Centers. IPC identification used ICD-10 palliative care coding. Main analysis first estimated pseudo values of 2-year and 8-year CIF of IPC. Linear regression models estimated the mean changes of pseudo-values (2 models: 2-year and 8-year CIF of IPC).

### Results:

Our analysis included 12375 patients, 5093 (41.2%) of whom were aged 65 or over. The median follow-up was 41.5 months (95% CI, 40.5-42.5). The CIF of IPC was 10.3% (95% CI, 10.2-10.4) and 24.8% (95% CI, 24.7-24.8) at two and eight years, respectively. At two years, among triple-negative patients, young patients (<65 yo) had a higher CIF of IPC than older patients after adjusting for cancer characteristics, centre, and period (65+<65:  $\beta$ =-0.05; 95% CI, -0.08 to -0.01). Among other tumour subtypes, older patients received short-term IPC more frequently than young patients (65+<65:  $\beta$ =0.02; 95% CI, 0.01 to 0.03). At eight years, outside large centres, IPC was delivered less frequently to older patients adjusted to cancer

characteristics and period (65+/ $<65$ :  $\beta=-0.03$ ; 95% CI, -0.06 to -0.01).

**Conclusions:**

We found a relatively low CIF of IPC and that age influenced IPC delivery. Young triple negative and older non-triple negative patients needed more short-term IPC. Older patients diagnosed outside large centres received less long-term IPC. These findings highlight the need for a wider implementation of IPC facilities and for more age-specific interventions.

**Key messages:**

- Our study highlighted particular challenge for older MBC patients diagnosed outside large French Comprehensive Cancer Centers.
- By identifying age at MBC diagnosis as a factor of IPC delivery, this report supports a wider implementation of IPC facilities and more age-specific interventions.
